# Supplementary material for: Structure and magnetic properties of hexagonal perovskite-type rare-earth vanadium germanides REVGe3 (RE = La–Nd)
Source: Royal Society of Chemistry journal article supplement (doi:10.1039/b908781h), 2009-01-01
Supplement: b908781h.pdf [file b908781h.pdf]

## SUPPLEMENTARY INFORMATION

### Structure and magnetic properties of hexagonal perovskite-type rare-earth vanadium germanides $REVGe_3$ ( $RE = La-Nd$ )

Haiying Bie and Arthur Mar<sup>1</sup>

*Department of Chemistry, University of Alberta, Edmonton, Alberta, Canada T6G 2G2*

**Table S1** Hexagonal unit cell parameters for  $LaV_{1-x}Cr_xGe_3$  and  $LaCr_{1-x}Mn_xGe_3$  compounds

**Fig. S1** Rietveld refinement results for (a)  $CeVGe_3$ , (b)  $PrVGe_3$ , and (c)  $NdVGe_3$ . The observed profile is indicated by circles and the calculated profile by the solid line. Bragg peak positions are located by the vertical tick marks. The difference plot is shown at the bottom.

---

<sup>1</sup> Corresponding author. Fax: +1-780-492-8231.  
*E-mail address:* arthur.mar@ualberta.ca (A. Mar).

**Table S1** Hexagonal unit cell parameters for  $\text{LaV}_{1-x}\text{Cr}_x\text{Ge}_3$  and  $\text{LaCr}_{1-x}\text{Mn}_x\text{Ge}_3$  compounds

| Compound                                      | $a$ (Å)   | $c$ (Å)   | $V$ (Å <sup>3</sup> ) | $c/a$ ratio |
|-----------------------------------------------|-----------|-----------|-----------------------|-------------|
| $\text{LaV}_{0.8}\text{Cr}_{0.2}\text{Ge}_3$  | 6.2972(1) | 5.7371(1) | 195.895(9)            | 0.9111      |
| $\text{LaV}_{0.6}\text{Cr}_{0.4}\text{Ge}_3$  | 6.2601(1) | 5.7446(1) | 194.963(7)            | 0.9177      |
| $\text{LaV}_{0.4}\text{Cr}_{0.6}\text{Ge}_3$  | 6.2390(1) | 5.7414(1) | 193.54(1)             | 0.9202      |
| $\text{LaV}_{0.1}\text{Cr}_{0.9}\text{Ge}_3$  | 6.2145(1) | 5.7588(1) | 192.61(1)             | 0.9267      |
| $\text{LaCr}_{0.9}\text{Mn}_{0.1}\text{Ge}_3$ | 6.2036(1) | 5.7638(1) | 192.098(9)            | 0.9291      |
| $\text{LaCr}_{0.8}\text{Mn}_{0.2}\text{Ge}_3$ | 6.2019(1) | 5.7637(1) | 191.988(8)            | 0.9293      |

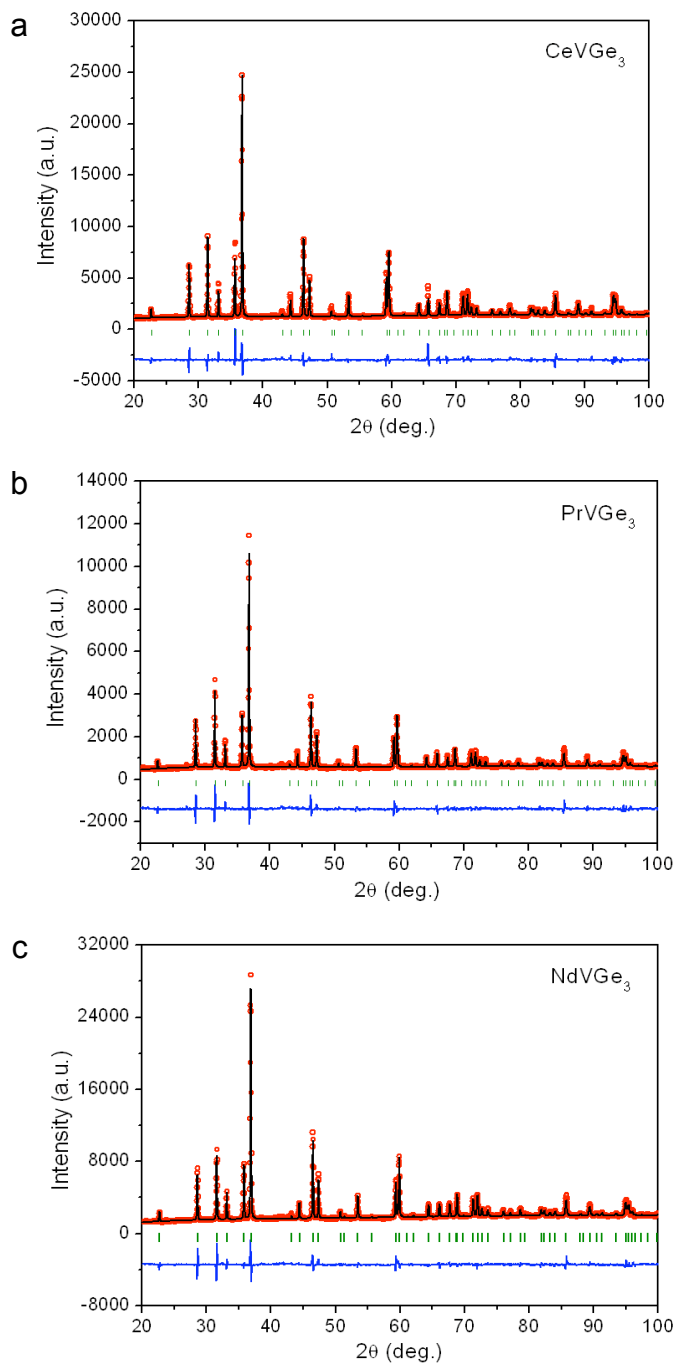

**Fig. S1** Rietveld refinement results for (a) CeVGe<sub>3</sub>, (b) PrVGe<sub>3</sub>, and (c) NdVGe<sub>3</sub>. The observed profile is indicated by circles and the calculated profile by the solid line. Bragg peak positions are located by the vertical tick marks. The difference plot is shown at the bottom.
